# Supplementary material
Source: PubMed Central journal article supplement (PMC3659922)
Supplement: supp_2012.064337_2012.064337.RUSSO_ROSSI_SUPPL.pdf [file supp_2012.064337_2012.064337.RUSSO_ROSSI_SUPPL.pdf]

# Outcome of 82 chronic myeloid leukemia patients treated with nilotinib or dasatinib after failure of two prior tyrosine kinase inhibitors

Antonella Russo Rossi,<sup>1</sup> Massimo Breccia,<sup>2</sup> Elisabetta Abruzzese,<sup>3</sup> Fausto Castagnetti,<sup>4</sup> Luigiana Luciano,<sup>5</sup> Antonella Gozzini,<sup>6</sup> Mario Annunziata,<sup>7</sup> Bruno Martino,<sup>8</sup> Fabio Stagno,<sup>9</sup> Francesco Cavazzini,<sup>10</sup> Mario Tiribelli,<sup>11</sup> Giuseppe Visani,<sup>12</sup> Patrizia Pregno,<sup>13</sup> Pellegrino Musto,<sup>14</sup> Carmen Fava,<sup>15</sup> Nicola Sgherza,<sup>1</sup> Francesco Albano,<sup>1</sup> Gianantonio Rosti,<sup>4</sup> Giuliana Alimena,<sup>2</sup> and Giorgina Specchia<sup>1</sup>

<sup>1</sup>Ematologia con Trapianto, Università degli Studi di Bari "Aldo Moro", Bari; <sup>2</sup>Dipartimento di Biotecnologie Cellulari ed Ematologia, Università "La Sapienza", Roma; <sup>3</sup>Ematologia, Ospedale Sant'Eugenio, Roma; <sup>4</sup>Ematologia, Università di Bologna; <sup>5</sup>Ematologia, Università "Federico II", Napoli, Italy; <sup>6</sup>Ematologia, Università di Firenze; <sup>7</sup>Ematologia, Ospedale Cardarelli, Napoli; <sup>8</sup>Ematologia, Ospedale Bianchi-Melacrino-Morelli, Reggio Calabria; <sup>9</sup>Ematologia, Ospedale Ferrarotto, Catania; <sup>10</sup>Ematologia, Università di Ferrara; <sup>11</sup>Ematologia, Università di Udine; <sup>12</sup>Ematologia, Ospedale San Salvatore, Pesaro; <sup>13</sup>Ematologia, Ospedale San Giovanni Battista, Torino; <sup>14</sup>Dipartimento Ematologia e Trapianto Cellule Staminali, Centro di Riferimento Oncologico della Basilicata, Rionero in Vulture; and <sup>15</sup>Ematologia, Polo Universitario ASO San Luigi Gonzaga, Orbassano, Italy

©2013 Ferrata Storti Foundation. This is an open-access paper. *Haematologica* 2013;98. doi:10.3324/haematol.2012.064337

Online Supplementary Table S1. Mutational analysis performed at the time of imatinib failure and after second-line TKI.

| Mutation at the time of imatinib failure (GROUP A) | Mutation at the time of second line TKI failure (GROUP A) | Mutation at the time of imatinib failure (GROUP B) | Mutation at the time of second line TKI failure (GROUP B) |
|----------------------------------------------------|-----------------------------------------------------------|----------------------------------------------------|-----------------------------------------------------------|
| NA                                                 | F359V                                                     | NA                                                 | F317L                                                     |
| WT                                                 | WT                                                        | NA                                                 | WT                                                        |
| F317L                                              | F317L                                                     | WT                                                 | M318T                                                     |
| NA                                                 | T315I                                                     | M244V                                              | M244V                                                     |
| WT                                                 | WT                                                        | WT                                                 | WT                                                        |
| WT                                                 | WT                                                        | WT                                                 | WT                                                        |
| A269S                                              | A269S                                                     | WT                                                 | WT                                                        |
| H295P-F311L-Y320H                                  | NA                                                        | WT                                                 | WT                                                        |
| M244V                                              | WT                                                        | WT                                                 | M244V                                                     |
| NA                                                 | F359V                                                     | WT                                                 | WT                                                        |
| M351T-F359C                                        | F359C                                                     | WT                                                 | WT                                                        |
| E255K                                              | WT                                                        | F359V-E450G                                        | NA                                                        |
| WT                                                 | WT                                                        | N322D-K400E-E409G-K467R                            | WT                                                        |
| Y253H                                              | NA                                                        | NA                                                 | WT                                                        |
| NA                                                 | Y253H-F359V                                               | WT                                                 | WT                                                        |
| WT                                                 | WT                                                        | WT                                                 | WT                                                        |
| S417F                                              | NA                                                        | NA                                                 | WT                                                        |
| WT                                                 | WT                                                        | NA                                                 | WT                                                        |
| E255V                                              | NA                                                        | M244V                                              | M244V                                                     |
| WT                                                 | NA                                                        | WT                                                 | NA                                                        |
| F317L                                              | Y253H                                                     | WT                                                 | F317L                                                     |
| WT                                                 | NA                                                        | WT                                                 | NA                                                        |
| WT                                                 | WT                                                        | WT                                                 | G250E                                                     |
| NA                                                 | WT                                                        | WT                                                 | NA                                                        |
|                                                    |                                                           | WT                                                 | WT                                                        |
|                                                    |                                                           | T315A-P309R                                        | T315I                                                     |
|                                                    |                                                           | M244V                                              | F317L                                                     |
|                                                    |                                                           | WT                                                 | M244V                                                     |
|                                                    |                                                           | M351K                                              | NA                                                        |
|                                                    |                                                           | WT                                                 | WT                                                        |
|                                                    |                                                           | WT                                                 | F317L                                                     |
|                                                    |                                                           | NA                                                 | WT                                                        |
|                                                    |                                                           | D276G                                              | WT                                                        |
|                                                    |                                                           | F359V                                              | WT                                                        |
|                                                    |                                                           | NA                                                 | F317L                                                     |
|                                                    |                                                           | NA                                                 | WT                                                        |
|                                                    |                                                           | NA                                                 | L387M                                                     |
|                                                    |                                                           | M351V                                              | M351T                                                     |

\*WT: wild type; NA: not available.
