# Supplementary material
Source: PubMed Central journal article supplement (PMC3659922)
Supplement: supp_2012.064337_2012_064337-Contributions.pdf [file supp_2012.064337_2012_064337-Contributions.pdf]

**Manuscript no. HAEMATOL/2012/064337 entitled “Outcome of 82 chronic myeloid leukemia patients treated with nilotinib or dasatinib after failure of two prior tyrosine kinase inhibitors“**

**Authors: Antonella Vita Russo Rossi, Massimo Breccia, Elisabetta Abruzzese, Fausto Castagnetti, Luigiana Luciano, Antonella Gozzini, Mario Annunziata, Bruno Martino, Fabio Stagno, Francesco Cavazzini, Mario Tiribelli, Giuseppe Visani, Patrizia Pregno, Pellegrino Musto, Carmen Fava, Nicola Sgherza, Francesco Albano, Gianantonio Rosti, Giuliana Alimena, and Giorgina Specchia**

**Information about the contributions of each person named as having participated in the study**

**1) Guarantor(s), i.e., person(s) who is (are) responsible for the integrity of the work as a whole:**

- Giorgina Specchia, Ematologia con Trapianto, Universita' degli Studi di Bari “Aldo Moro”, Bari, giorgina.specchia@uniba.it
- Antonella Russo Rossi, Ematologia con Trapianto, Universita' degli Studi di Bari “Aldo Moro”, Bari, antorussorossi@libero.it

According to the International Committee of Medical Journal Editors (ICMJE) ([http://www.icmje.org/ethical\\_1author.html](http://www.icmje.org/ethical_1author.html)): “Authorship credit should be based on: 1) substantial contributions to conception and design, acquisition of data, or analysis and interpretation of data; 2) drafting the article or revising it critically for important intellectual content; and 3) final approval of the version to be published. Authors should meet conditions 1, 2, and 3 ..... Acquisition of funding, collection of data, or general supervision of the research group alone does not constitute authorship”.

The guarantors of this manuscript confirm that all persons designated as authors qualify for authorship, and that each author has participated sufficiently in the work to take public responsibility for appropriate portions of the content.

**2) Authors who participated in the conception of the study: Giorgina Specchia and Antonella Russo Rossi**

**3) Design & Methods. The following authors were responsible for specific investigations:**

- Antonella Russo Rossi and Massimo Breccia were responsible for acquisition of data, analysis and interpretation of data
- Francesco Albano, Elisabetta Abruzzese, Fausto Castagnetti, Luigiana Luciano, Antonella Gozzini, Mario Annunziata, Bruno Martino, Fabio Stagno, Francesco Cavazzini, Mario Tiribelli, Giuseppe Visani, Patrizia Pregno, Pellegrino Musto, Carmen Fava, Nicola Sgherza, Gianantonio Rosti and Giuliana Alimena were responsible for acquisition and collection of data

**4) Results. The following authors were responsible for specific portions of the results, including figures and tables:**

- Antonella Russo Rossi was responsible for analysis and interpretation of data and for table 2 e figure 1
- Massimo Breccia was responsible for analysis and interpretation of data and for table 1
- Nicola Sgherza was responsible for analysis and interpretation of data and for table S1

**5) Writing the manuscript. The following authors were responsible for writing the manuscript:**

- Antonella Russo Rossi and Massimo Breccia were responsible for drafting the article
- Giorgina Specchia was responsible for final approval of the version to be published

**6) Contributors Listed in Acknowledgments:**

- Associazione Italiana contro le Leucemie, Linfomi e Mieloma (AIL)-Bari supported acquisition of funding
- Mario Delia provided statistical analysis of data
- Paolo Avanzini, Ferdinando Porretto and Diamante Turri provided data collection
- MVC Pragnell provided language revision of the manuscript
